# Supplementary material for: Illumina MiSeq Sequencing Reveals Diverse Microbial Communities of Activated Sludge Systems Stimulated by Different Aromatics for Indigo Biosynthesis from Indole
Source: PLOS journal article supplement (doi:10.1371/journal.pone.0125732), 2015-04-30
Supplement: S1 (10.1371/journal.pone.0125732.s001) [file journal.pone.0125732.s001]

Supporting Information for *PLoS ONE*

**Illumina MiSeq sequencing reveals diverse microbial communities of activated sludge systems stimulated by different aromatics for indigo biosynthesis from indole**

Xuwan Zhang, Yuanyuan Qu\*, Qiao Ma, Zhaojing Zhang, Duanxing Li, Jingwei Wang, Wenli Shen, E Shen, Jiti Zhou

Key Laboratory of Industrial Ecology and Environmental Engineering (Ministry of Education), School of Environmental Science and Technology, Dalian University of Technology, Dalian, China

\*Corresponding Author

E-mail: [qyy@dlut.edu.cn](mailto:qyy@dlut.edu.cn) (YQ).

15 **Table A** Group setup of the experiment in this study.

| Group | Time <sup>a</sup> | Samples            | Conditions                          |
|-------|-------------------|--------------------|-------------------------------------|
| AS    | T0                | A1, A2, A3         | Original activated sludge           |
|       | T1                | B1, B2, B3, B4, B5 |                                     |
| G1    | T2                | B6, B7, B8         | Induced with naphthalene and indole |
|       | T3                | B9, B10, B11       |                                     |
|       | T1                | C1, C2, C3, C4, C5 |                                     |
| G2    | T2                | C6, C7, C8         | Induced with phenol and indole      |
|       | T3                | C9, C10, C11       |                                     |
|       | T1                | D1, D2, D3, D4, D5 |                                     |
| G3    | T2                | D6, D7, D8         | Induced only with indole            |
|       | T3                | D9, D10, D11       |                                     |

16 <sup>a</sup>T0 stands for the operation period before domestication, and samples were selected from the  
17 original activated sludge; T1 stands for 0-20 days, and samples were selected at 0<sup>th</sup>, 3<sup>rd</sup>, 6<sup>th</sup>,  
18 9<sup>th</sup> and 12<sup>th</sup> day; T2 stands for 20-40 days, and samples were selected at 21<sup>th</sup>, 27<sup>th</sup> and 33<sup>th</sup>  
19 day; T3 stands for 40-69 days, and samples were selected at 57<sup>th</sup>, 63<sup>th</sup> and 69<sup>th</sup> day.

20

21 **Table B** Richness and diversity indices of the original AS and three groups.

| Groups | Shannon Index (H) <sup>a</sup> | Simpson Index (D) <sup>b</sup> | Chao1 <sup>c</sup> | OTU  |
|--------|--------------------------------|--------------------------------|--------------------|------|
| AS     | 5.90                           | 0.011                          | 2838               | 2553 |
| G1     | 4.15                           | 0.054                          | 2752               | 2110 |
| G2     | 4.74                           | 0.025                          | 3188               | 2480 |
| G3     | 4.66                           | 0.029                          | 2740               | 2168 |

22 <sup>a</sup>Shannon index (H): a higher value represents more diversity.

23 <sup>b</sup>Simpson Index (D): a higher value represents less diversity.

24 <sup>c</sup>Chao1 richness estimator: a higher number indicates higher richness.

25

26 **Table C** Significance tests of the differences of the microbial communities<sup>a</sup>.

| Data sets             | Adonis <sup>b</sup> |          | ANOSIM <sup>c</sup> |          | MRPP <sup>d</sup> |          |
|-----------------------|---------------------|----------|---------------------|----------|-------------------|----------|
|                       | R <sup>2</sup>      | <i>P</i> | R                   | <i>P</i> | $\delta$          | <i>P</i> |
| T1 stage vs. T2 stage | 0.108               | 0.008    | 0.169               | 0.031    | 0.632             | 0.006    |
| T1 stage vs. T3 stage | 0.173               | 0.001    | 0.437               | 0.001    | 0.633             | <0.001   |
| T2 stage vs. T3 stage | 0.149               | 0.011    | 0.282               | 0.015    | 0.609             | 0.006    |
| G1 vs. G2             | 0.164               | 0.001    | 0.366               | 0.001    | 0.631             | <0.001   |
| G1 vs. G3             | 0.254               | 0.001    | 0.606               | 0.001    | 0.576             | <0.001   |
| G2 vs. G3             | 0.189               | 0.001    | 0.517               | 0.001    | 0.581             | <0.001   |

27 <sup>a</sup>Different statistical tests were used with Bray-Curtis distances, and *P* values were of  
 28 corresponding significance tests.

29 <sup>b</sup>Adonis, permutational multivariate analysis of variance with the Adonis function.

30 <sup>c</sup>ANOSIM, analysis of similarity.

31 <sup>d</sup>MRPP, multiresponse permutation procedure.

32 **Table D** Correlations between the relative abundance of microbial community compositions and indigo yields.

| Phylum                     | Class                      | Family                    | Genus                   | G1             |                      | G2             |                   | G3             |                   |
|----------------------------|----------------------------|---------------------------|-------------------------|----------------|----------------------|----------------|-------------------|----------------|-------------------|
|                            |                            |                           |                         | r              | P value <sup>a</sup> | r              | P value           | r              | P value           |
| <i>Proteobacteria</i>      | -                          | -                         | -                       | <b>0.9890</b>  | <b>&lt;0.0001</b>    | <b>0.8306</b>  | <b>0.0029</b>     | <b>0.9582</b>  | <b>&lt;0.0001</b> |
| <i>Proteobacteria</i>      | <i>Betaproteobacteria</i>  | <i>Comamonadaceae</i>     | <i>Comamonas</i>        | -0.1354        | 0.7092               | -0.3654        | 0.2991            | 0.1118         | 0.7585            |
| <i>Proteobacteria</i>      | <i>Betaproteobacteria</i>  | <i>Comamonadaceae</i>     | <i>Diaphorobacter</i>   | 0.0703         | 0.8470               | 0.3487         | 0.3234            | 0.6063         | 0.0631            |
| <i>Proteobacteria</i>      | <i>Betaproteobacteria</i>  | <i>Alcaligenaceae</i>     | <i>Pusillimonas</i>     | 0.6029         | 0.0650               | <b>0.9500</b>  | <b>&lt;0.0001</b> | 0.5292         | 0.1157            |
| <i>Proteobacteria</i>      | <i>Alphaproteobacteria</i> | <i>Rhodobacteraceae</i>   | <i>Paracoccus</i>       | 0.5497         | 0.0997               | 0.2645         | 0.4602            | 0.4012         | 0.2505            |
| <i>Proteobacteria</i>      | <i>Alphaproteobacteria</i> | <i>Phyllobacteriaceae</i> | <i>Aquamicrobium</i>    | 0.5110         | 0.1312               | -0.0083        | 0.9818            | <b>0.6862</b>  | <b>0.0284</b>     |
| <i>Proteobacteria</i>      | <i>Gammaproteobacteria</i> | <i>Pseudomonadaceae</i>   | <i>Pseudomonas</i>      | <b>-0.8770</b> | <b>0.0009</b>        | -0.2730        | 0.4454            | -0.5692        | 0.0859            |
| <i>Deinococcus-Thermus</i> | <i>Truepera</i>            | <i>Trueperaceae</i>       | <i>Truepera</i>         | -0.3079        | 0.3868               | -0.4780        | 0.1623            | <b>0.9104</b>  | <b>0.0003</b>     |
| <i>Proteobacteria</i>      | <i>Betaproteobacteria</i>  | <i>Alcaligenaceae</i>     | <i>Castellaniella</i>   | -0.1272        | 0.7262               | <b>0.7943</b>  | <b>0.0061</b>     | <b>0.8208</b>  | <b>0.0036</b>     |
| <i>Proteobacteria</i>      | <i>Alphaproteobacteria</i> | <i>Phyllobacteriaceae</i> | <i>Mesorhizobium</i>    | <b>0.7105</b>  | <b>0.0213</b>        | -0.1870        | 0.6049            | -0.5030        | 0.1384            |
| <i>Proteobacteria</i>      | <i>Alphaproteobacteria</i> | <i>Caulobacteraceae</i>   | <i>Brevundimonas</i>    | -0.1522        | 0.6747               | <b>0.9039</b>  | <b>0.0003</b>     | <b>0.9338</b>  | <b>0.0001</b>     |
| <i>Proteobacteria</i>      | <i>Alphaproteobacteria</i> | <i>Sphingomonadaceae</i>  | <i>Sphingosinicella</i> | 0.6310         | 0.0504               | <b>0.9379</b>  | <b>0.0001</b>     | <b>0.9736</b>  | <b>&lt;0.0001</b> |
| <i>Proteobacteria</i>      | <i>Betaproteobacteria</i>  | <i>Rhodocyclaceae</i>     | <i>Dechloromonas</i>    | -0.4604        | 0.1806               | <b>-0.7929</b> | <b>0.0062</b>     | <b>-0.7566</b> | <b>0.0113</b>     |
| <i>Chloroflexi</i>         | <i>Anaerolineae</i>        | <i>Anaerolineaceae</i>    | <i>Longilinea</i>       | <b>-0.9557</b> | <b>&lt;0.0001</b>    | <b>-0.6476</b> | <b>0.0429</b>     | <b>-0.7071</b> | <b>0.0222</b>     |
| <i>Bacteroidetes</i>       | <i>Sphingobacteria</i>     | <i>Chitinophagaceae</i>   | <i>Ferruginibacter</i>  | -0.4813        | 0.1590               | -0.5955        | 0.0693            | <b>-0.9148</b> | <b>0.0002</b>     |

33 <sup>a</sup>P<0.05 indicated the correlation was significant.

34

35 **Table E** Correlations between the relative abundance of the major unclassified OTU and indigo yields.

| OTU      | Phylum                | G1                     |                |                             | G2        |                |                | G3        |                |                |
|----------|-----------------------|------------------------|----------------|-----------------------------|-----------|----------------|----------------|-----------|----------------|----------------|
|          |                       | Abundance <sup>a</sup> | r              | <i>P</i> value <sup>b</sup> | Abundance | r              | <i>P</i> value | Abundance | r              | <i>P</i> value |
| OTU_129  | <i>Proteobacteria</i> | 13.50                  | 0.1025         | 0.7781                      | 5.53      | 0.5243         | 0.1198         | 1.27      | <b>0.8813</b>  | <b>0.0008</b>  |
| OTU_2732 | <i>Proteobacteria</i> | 1.13                   | 0.2982         | 0.4027                      | 1.62      | 0.6669         | 0.0352         | 0.06      | 0.0996         | 0.7842         |
| OTU_3338 | <i>Proteobacteria</i> | 0.80                   | 0.4881         | 0.1523                      | 1.67      | 0.5302         | 0.1149         | 2.29      | -0.4118        | 0.2371         |
| OTU_863  | <i>Proteobacteria</i> | 1.72                   | -0.1816        | 0.6157                      | 0.56      | <b>0.8933</b>  | <b>0.0005</b>  | 4.40      | 0.2602         | 0.4678         |
| OTU_300  | <i>Bacteroidetes</i>  | 1.21                   | <b>-0.9208</b> | <b>0.0002</b>               | 3.09      | <b>-0.7680</b> | <b>0.0095</b>  | 1.86      | -0.5832        | 0.0768         |
| OTU_473  | <i>Bacteroidetes</i>  | 1.68                   | <b>-0.9703</b> | <b>0.0000</b>               | 0.08      | <b>-0.8754</b> | <b>0.0009</b>  | 1.22      | <b>-0.7791</b> | <b>0.0079</b>  |

36 <sup>a</sup>The average abundance of the OTU in each group was present in the table, and only the OTU with the abundance higher than 1% of the total  
37 sequences in more than two groups was selected.

38 <sup>b</sup>*P*<0.05 indicated the correlation was significant.

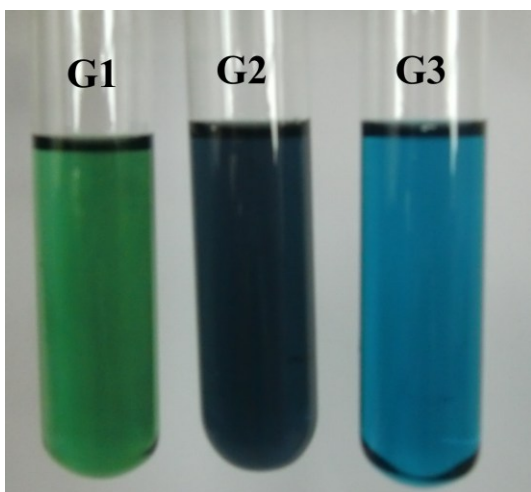

**Fig A. Color of the products produced by the three groups.** The reaction mixture were centrifuged at 10,000×g for 5 min, and the pellets were re-suspended in an equal volume of dimethylsulfoxide for the extraction of indigoid pigments.

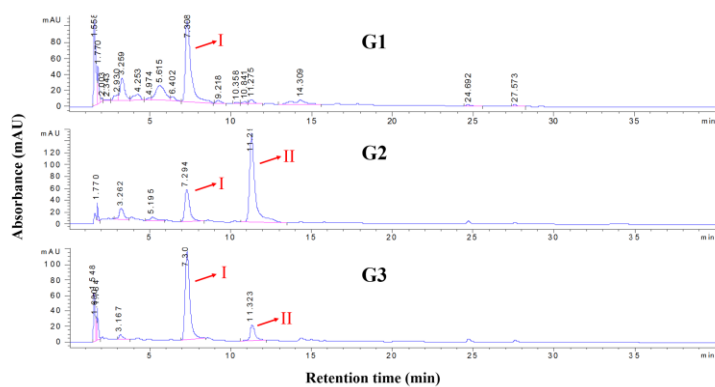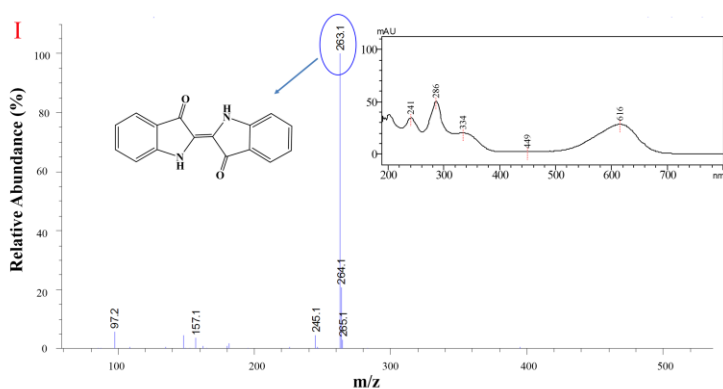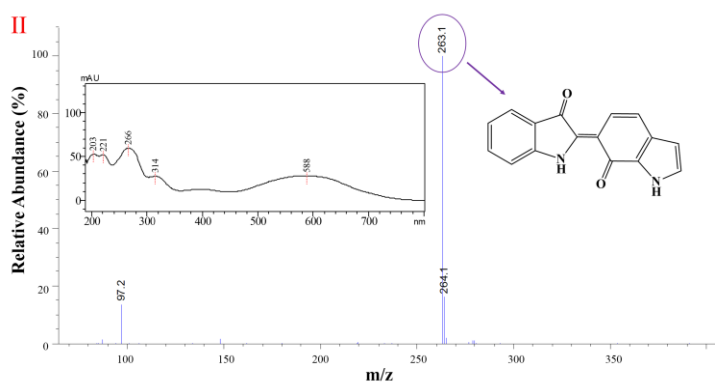

**Fig B. HPLC-MS analysis of the products formed by the three groups. a.** HPLC spectra of the products. **b.** Mass spectra of the product indigo. **c.** Mass spectra of the purple product. The pigments of I and II were indicated by the arrows, corresponding to indigo and purple product, 2-(7-oxo-1H-indol-6(7H)-ylidene) indolin-3-one, respectively.



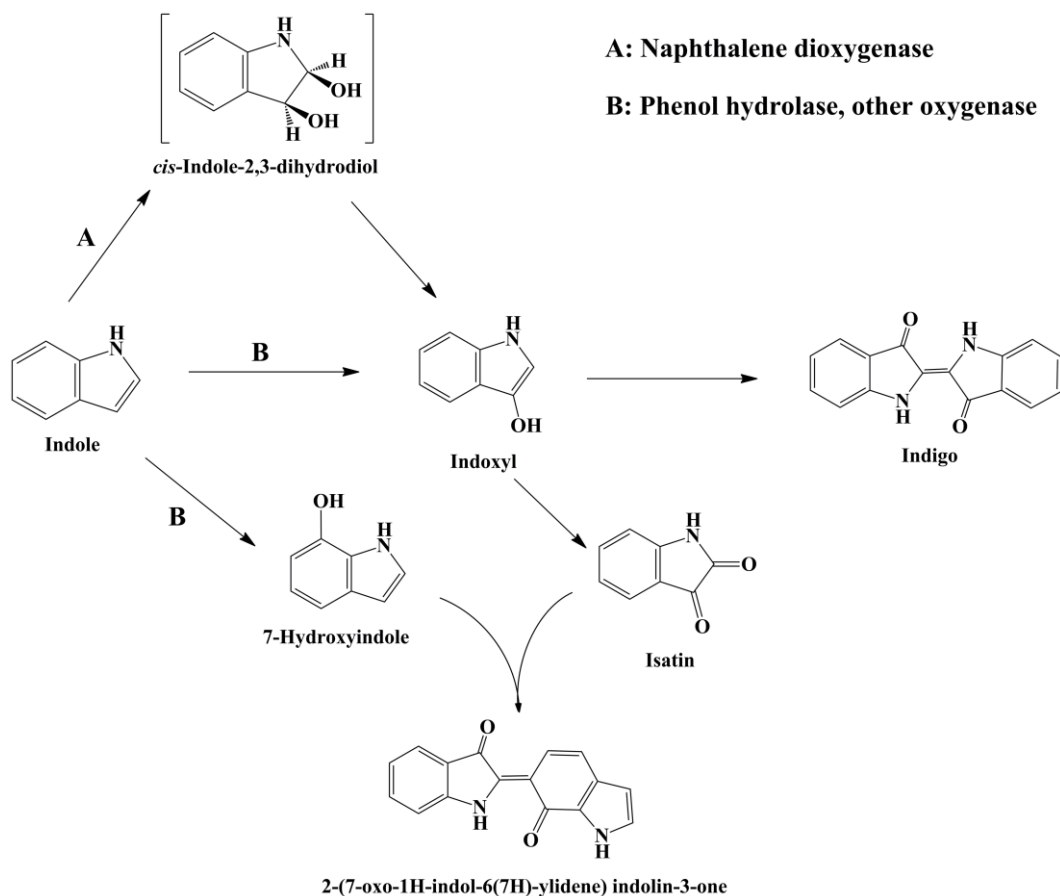

**Fig C. Proposed pathways for the production of indigoids from indole by the activated sludge systems.** Indole can be hydroxylated to form indoxyl by oxygenases A and B, which may be further oxidized to form isatin. Condensation of two molecules of indoxyl by air oxidation will lead to the production of indigo. Besides, indole can be also oxidized by oxygenase B to form 7-hydroxyindole, which can react with isatin to form 2-(7-oxo-1H-indol-6(7H)-ylidene) indolin-3-one. Oxygenase A may be naphthalene dioxygenase in G1; B may be phenol hydrolase in G2 or other oxygenases in G3.

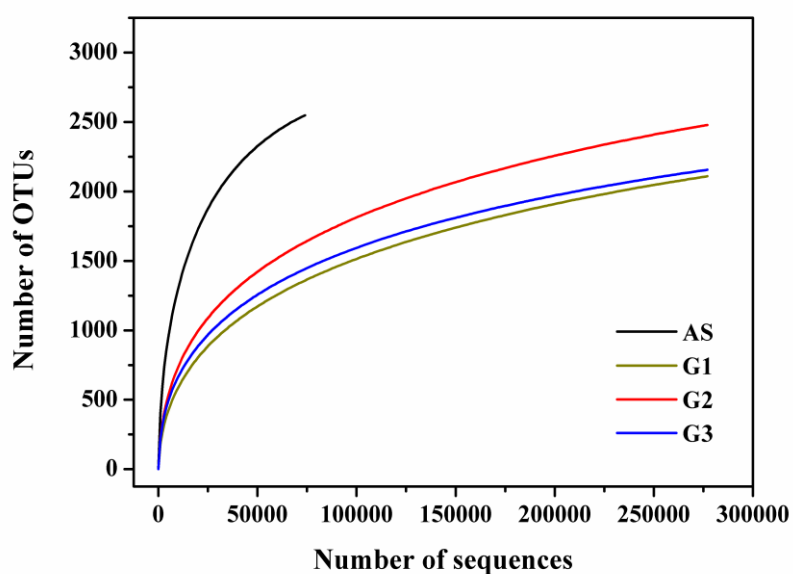

**Fig D. Rarefaction curves base on Illumina MiSeq sequencing of microbial communities.**

The OTUs were defined by 3% distances. The rarefaction curve of AS was derived from 3 samples, while those of each group were from 11 samples. The detailed group setup was presented in Table A in S1 File.

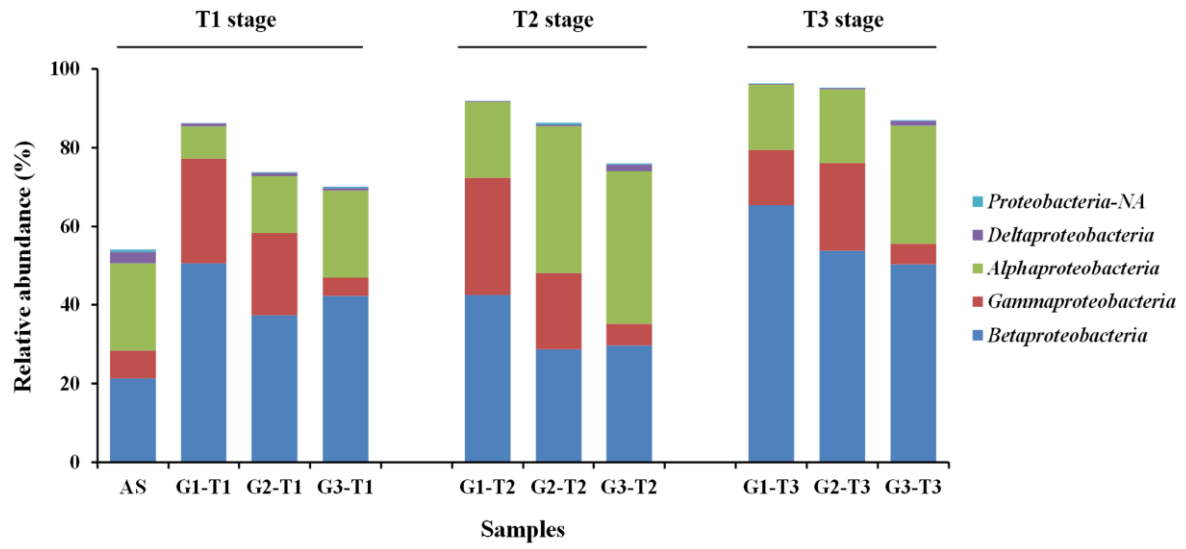

**Fig E. Relative abundance of *Proteobacteria* subdivisions in each group at different stages.**
